# Supplementary material for: Ginkgo biloba extract (Egb761) attenuates zinc-induced tau phosphorylation at Ser262 by regulating GSK3β activity in rat primary cortical neurons
Source: Royal Society of Chemistry journal article supplement (doi:10.1039/c5fo00219b), 2015-01-01
Supplement: c5fo00219b1.pdf [file c5fo00219b1.pdf]

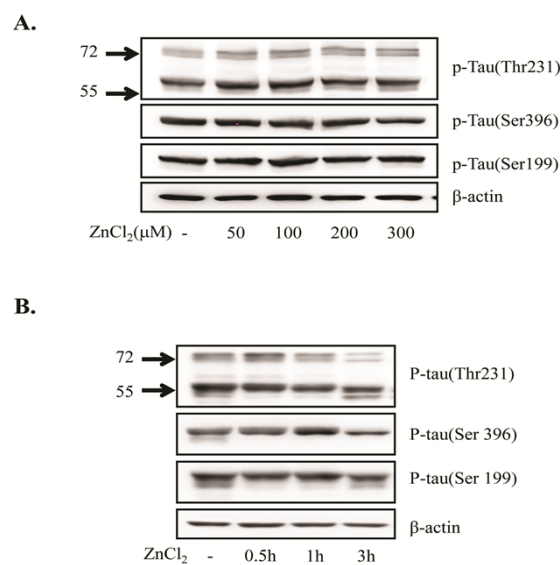

Supplementary fig.1. Tau phosphorylation on other sites in rat primary cortical neurons. A. Rat primary cortical neurons were incubated in serum-free minimum essential medium (MEM) with ZnCl<sub>2</sub> for varying dose (50, 100, 200, 300 μM) for 3 h (A) and with 300 μM of ZnCl<sub>2</sub> for varying times (0.5, 1h, 3h) at 37°C (B). The cells were harvested for western blot analyses, and the expression of tau phosphorylation was assessed by measuring the levels of immunoreactivity to the phospho-tau-Ser396, Thr231, and Ser199 antibody. The total amounts of tau and β-actin were measured as controls.
